# Supplementary material for: Supramolecular assembly of ligand-directed triangular {CuII3Cl} clusters with spin frustration and spin-chain behaviour
Source: Royal Society of Chemistry journal article supplement (doi:10.1039/b402487g), 2004-01-01
Supplement: b402487g.doc [file b402487g.doc]

Supramolecular assembly of ligand-directed triangular {CuII3Cl} clusters with spin frustration and spin-chain behaviour

Georg Seebera, Paul Kögerler,b Benson M. Kariukic and Leroy Cronina*

a Department of Chemistry, The University of Glasgow, Glasgow, G12 8QQ, UK.
b Ames Laboratory and Department of Physics & Astronomy, Iowa State University, Ames, IA 50011, USA. c School of Chemistry, The University of Birmingham, Edgbaston, Birmingham, B15 2TT, UK.

E-mail:L.Cronin@chem.gla.ac.uk

**Experimental Details:**

Compound **1** and **2**: A solution of anhydrous copper(II) halide (0.49 mmol of CuCl2 for **1** or CuBr2 for **2**) in methanol (5 ml) was added to a solution of tach (0.48 mmol) in methanol (30 ml) which was previously adjusted to pH 6.5 using 2 M hydrochloric acid, resulting in an instant color change to pale blue for **1** and turquoise for **2**. The mixture was stirred for three hours and over which time the product precipitated as a powder and was isolated by filtration. Compound **1**: blue powder, yield: 46 mg (0.05 mmol, 32 %). M.p. 202 °C (decomp.); IR (diamond anvil cell) ν / cm–1: 3287(m), 3225(m), 3152(m), 3128(m), 3036(m), 2939(m), 1597(vs), 1528(vs), 1458(vs), 1358(m), 1342(s), 1169(vs), 1123(vs), 1076(m), 1045(s), 1015(m), 910(vs), 891(s), 687(vs). MS (ES-TOF+): m/z (%) [M]+ not observed, 227 (25%, [Cu(tach)Cl]+), 290 (8, [Cu2(tach)Cl]+), 356 (10, [Cu(tach)2Cl]+), 491 (100, [Cu2(tach)2Cl3]+). Elemental analysis for C18H48Cl9Cu3N9, found (expected) %: C 24.09 (24.01), H 5.39 (5.37), N 13.83 (14.00). Compound **2**: turquoise powder, yield: 58 mg (0.06 mmol, 37 %). M.p. 200 °C (decomp.); IR (diamond anvil cell) ν / cm‑1: 3283(m), 3221(m), 3148(m), 3113(m), 3017(m), 2932(m), 1589(vs), 1516(vs), 1458(vs), 1358(m), 1339(s), 1165(vs), 1123(vs), 1069(m), 1045(s), 1007(m), 910(vs), 891(s), 683(vs). MS (ES-TOF+): m/z (%) [M]+ not observed, 227 (12, [Cu(tach)Cl]+), 273 (45, [Cu(tach)Br]+), 491 (61, [Cu2(tach)2Cl3]+), 535 (100, [Cu2(tach)2Cl2Br]+), 581 (49, [Cu2(tach)2ClBr2]+), 625 (10, [Cu2(tach)2Br3]+). Elemental analysis for C18H48Br2Cl7Cu3N9, found (expected) %: C 21.92 (21.85), H 4.86 (4.89), N 12.64 (12.74). Crystals suitable for X-ray analysis were obtained from a reaction using a 1:2 metal-salt/ligand ratio under the afore-mentioned reaction conditions (note: 0.2 M HCl was used to adjust the pH to 6.5). Reducing the volume to 2 ml and crystallization by diffusion of acetone yielded **1** and **2** as light blue and turquoise crystals, respectively. In both cases the identity of the powder material obtained and the crystalline material was established by powder X-ray diffraction of the microcrystalline solid and the simulation of the powder XRD spectrum from the single crystal data.

**Magnetic measurements and analysis**:

Magnetic susceptibility data for 2 K < T < 290 K have been obtained using a Quantum Designs MPMS-5 SQUID magnetometer for various fields from 0.01 to 5 Tesla. Diamagnetic corrections are calculated to: χdia(**1**) = –4.0 × 10–4 emu mol–1; χdia(**2**) = –4.1 × 10–4 emu mol–1. The zero-field spin Hamiltonian Ĥ = –*J*(*S*1*S*2 + *S*2*S*3 + *S*3*S*1) splits the three degenerate energy levels into one excited *S* = 3/2 and two degenerate *S* = 1/2 states by 3*J*/2; the zero-field susceptibility then equates to χ = (*N*A*g*2 µB2/4*k*T)(1 + 5e3*J*/*k*T)/(1 + e3*J*/*k*T). Susceptibility data for compound **2** has been used for fitting.
